# Supplementary material
Source: MDPI journal article supplement (https://www.mdpi.com/2311-7524/8/7/589)
Supplement: s1 [file s1]

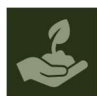

**Table S1.** Mean values, as percentage of control (0% dose), of the colony growth of different isolates of oomycetes and fungi in Potato Dextrose Agar plates, amended with increasing doses of the giant reed extract. Standard deviations are reported in parentheses.

| Isolate\Extract dose (%)                   | Colony growth (% of control) |              |             |             |
|--------------------------------------------|------------------------------|--------------|-------------|-------------|
|                                            | 10                           | 20           | 40          | 80          |
| <b>Soilborne pathogens</b>                 |                              |              |             |             |
| <i>Pythium ultimum</i> 16                  | 88.9 (2.3)                   | 74.2 (10.4)  | 0.1 (0.1)   | 0.0 (0.0)   |
| <i>Pythium ultimum</i> 22                  | 69.4 (2.1)                   | 41.7 (3.5)   | 24.2 (4.5)  | 0.0 (0.0)   |
| <i>Phytophthora cactorum</i>               | 82.8 (9.0)                   | 0.5 (0.1)    | 0.2 (0.2)   | 0.0 (0.0)   |
| <i>Ceratobasidium</i> sp. RH3              | 93.9 (1.8)                   | 83.2 (0.8)   | 63.0 (1.0)  | 28.3 (0.4)  |
| <i>Rhizoctonia solani</i> DAF3001          | 85.3 (5.9)                   | 75.6 (3.5)   | 57.8 (1.2)  | 28.7 (3.5)  |
| <i>Sclerotium rolfsii</i> 1                | 32.6 (2.0)                   | 13.7 (0.8)   | 1.5 (0.0)   | 0.0 (0.0)   |
| <i>Sclerotium rolfsii</i> 2                | 31.6 (3.1)                   | 16.4 (4.3)   | 1.6 (0.0)   | 0.0 (0.0)   |
| <i>Sclerotinia sclerotiorum</i> MA3        | 85.9 (2.8)                   | 68.8 (0.7)   | 45.6 (0.3)  | 13.1 (1.0)  |
| <i>Phoma betae</i>                         | 165.2 (5.7)                  | 161.7 (1.7)  | 156.2 (0.9) | 97.5 (1.7)  |
| <i>Fusarium oxysporum</i> L1               | 107.8 (0.5)                  | 111.8 (1.1)  | 110.3 (0.9) | 85.7 (0.5)  |
| <i>Fusarium oxysporum</i> 11.22            | 109.2 (0.5)                  | 111.3 (1.1)  | 108.9 (0.9) | 85.9 (0.5)  |
| <b>Airborne fungi</b>                      |                              |              |             |             |
| <i>Botrytis cinerea</i> 1                  | 89.7 (2.8)                   | 95.6 (2.2)   | 82.7 (2.2)  | 0.3 (0.1)   |
| <i>Botrytis cinerea</i> 2                  | 118.7 (4.3)                  | 193.7 (10.4) | 167.2 (5.4) | 0.4 (0.0)   |
| <i>Alternaria alternata</i> 1              | 123.6 (13.5)                 | 152.9 (5.8)  | 146.8 (4.7) | 102.0 (2.6) |
| <i>Alternaria alternata</i> 2              | 92.6 (0.5)                   | 91.5 (1.0)   | 78.8 (0.5)  | 41.9 (0.5)  |
| <b>Wood decay fungi</b>                    |                              |              |             |             |
| <i>Phanerochaete chrysosporium</i> D85242T | 40.9 (2.7)                   | 12.4 (2.0)   | 0.0 (0.0)   | 0.0 (0.0)   |
| <i>Trametes versicolor</i> D83211          | 48.6 (1.6)                   | 18.6 (0.9)   | 0.2 (0.0)   | 0.0 (0.0)   |
| <i>Pleurotus ostreatus</i>                 | 80.1 (21.4)                  | 86.0 (9.3)   | 66.8 (1.6)  | 0.1 (0.1)   |
| <b>Pathogenic and non-pathogenic</b>       |                              |              |             |             |
| <b><i>Trichoderma</i> sp.</b>              |                              |              |             |             |
| <i>Trichoderma pleuroticola</i> 488        | 78.6 (7.3)                   | 58.7 (5.0)   | 39.1 (0.8)  | 30.6 (1.5)  |
| <i>Trichoderma pleuroti</i> 498            | 89.6 (1.0)                   | 72.9 (2.2)   | 33.7 (2.0)  | 0.0 (0.0)   |
| <i>Trichoderma gamsii</i> IMO5             | 89.0 (1.2)                   | 57.2 (1.9)   | 20.1 (5.7)  | 0.0 (0.0)   |
| <i>Trichoderma afroharzianum</i> B75       | 74.8 (10.3)                  | 50.3 (14.4)  | 21.0 (6.8)  | 0.2 (0.1)   |

**Table S2.** Mean values, as percentage of control (0% dose), of the number of sclerotia per plate produced by *Sclerotium rolfsii* and *Sclerotinia sclerotiorum* in Potato Dextrose Agar plates amended with increasing doses of the giant reed extract. Standard deviations are reported in parentheses.

| Isolate\Extract dose (%)            | Number of sclerotia per plate (% of control) |            |           |           |
|-------------------------------------|----------------------------------------------|------------|-----------|-----------|
|                                     | 10                                           | 20         | 40        | 80        |
| <i>Sclerotium rolfsii</i> 1         | 113 (52)                                     | 166 (8.6)  | 43 (19.9) | 0.0 (0.0) |
| <i>Sclerotium rolfsii</i> 2         | 106 (43.8)                                   | 132 (15.6) | 43 (40)   | 0.0 (0.0) |
| <i>Sclerotinia sclerotiorum</i> MA3 | 105 (2.4)                                    | 90 (4.1)   | 96 (4.7)  | 47 (20)   |

**Table S3.** Mean values of emergence (%) of zucchini seedlings in trays filled with peat or sand treated with the undiluted giant reed extract in comparison with untreated control. Standard deviations are reported in parentheses.

| Treatment\substrate | Emergence (%) |         |
|---------------------|---------------|---------|
|                     | Peat          | Sand    |
| Untreated control   | 87 (15)       | 97 (6)  |
| Treated             | 70 (27)       | 83 (15) |
